# Supplementary material
Source: ML conference proceedings conference paper supplement (https://proceedings.mlr.press/v119/pham20a.html)
Supplement: Supplementary file [file pham20a-supp.pdf]

---

## Supplement to "On Unbalanced Optimal Transport: An Analysis of Sinkhorn Algorithm"

---

In this appendix, we provide proofs for the remaining results in the paper.

### 6. Proofs of Remaining Results

Before proceeding with the proofs, we state the following simple inequalities:

**Lemma 6.** *The following inequalities are true for all positive  $x_i, y_i, x, y$  and  $0 \leq z < \frac{1}{2}$ :*

- (a)  $\min_{1 \leq i \leq n} \frac{x_i}{y_i} \leq \frac{\sum_{i=1}^n x_i}{\sum_{i=1}^n y_i} \leq \max_{1 \leq i \leq n} \frac{x_i}{y_i},$
- (b)  $\exp(z) \leq 1 + |z| + |z|^2,$
- (c) *If  $\max\left\{\frac{x}{y}, \frac{y}{x}\right\} \leq 1 + \delta$ , then  $|x - y| \leq \delta \min\{x, y\},$*
- (d)  $\left(1 + \frac{1}{x}\right)^{x+1} \geq e.$

*Proof of Lemma 6.*

(a) Given  $x_i$  and  $y_i$  positive, we have

$$\min_{1 \leq i \leq n} \frac{x_i}{y_i} \leq \frac{x_j}{y_j} \leq \max_{1 \leq i \leq n} \frac{x_i}{y_i},$$

$$y_j \left( \min_{1 \leq i \leq n} \frac{x_i}{y_i} \right) \leq x_j \leq y_j \left( \max_{1 \leq i \leq n} \frac{x_i}{y_i} \right).$$

Taking the sum over  $j$ , we get

$$\left( \sum_{j=1}^n y_j \right) \left( \min_{1 \leq i \leq n} \frac{x_i}{y_i} \right) \leq \sum_{j=1}^n x_j \leq \left( \sum_{j=1}^n y_j \right) \left( \max_{1 \leq i \leq n} \frac{x_i}{y_i} \right),$$

$$\min_{1 \leq i \leq n} \frac{x_i}{y_i} \leq \frac{\sum_{j=1}^n x_j}{\sum_{j=1}^n y_j} \leq \max_{1 \leq i \leq n} \frac{x_i}{y_i}.$$

(b) For the second inequality,  $\exp(x) \leq 1 + |x| + |x|^2$ , we have to deal with the case  $x > 0$ . Since  $x \leq \frac{1}{2}$ ,

$$\begin{aligned} \exp(x) &= \sum_{n=1}^{\infty} \frac{x^n}{n!} = 1 + x + x^2 - \frac{x^2}{2} + \sum_{n=3}^{\infty} \frac{x^n}{n!} \leq 1 + x + x^2 - \frac{x^2}{2} + \frac{x^3}{6} \sum_{n=3}^{\infty} x^{n-3}, \\ &\leq 1 + x + x^2 - \frac{x^2}{2} + \frac{x^3}{6} \frac{1}{1-x} \leq 1 + x + x^2 - \frac{x^2}{2} + \frac{x^3}{3} \leq 1 + x + x^2. \end{aligned}$$

(c) For the third inequality, WLOG assume  $x > y$ . Then, we have

$$\frac{x}{y} \leq 1 + \delta \Rightarrow x \leq y + y\delta \Rightarrow |x - y| \leq y\delta.$$

(d) For the fourth inequality, taking the log of both sides, it is equivalent to  $(x+1)[\log(x+1) - \log(x)] \geq 1$ . By the mean value theorem, there exists a number  $y$  between  $x$  and  $x+1$  such that  $\log(x+1) - \log(x) = 1/y$ , then  $(x+1)/y \geq 1$ .  $\square$

By the choice of  $\eta = \frac{\varepsilon}{U}$  and the definition of  $U$ , we also have the following conditions on  $\eta$ :

$$\eta \leq \frac{1}{2}; \quad \frac{\eta}{\tau} \leq \frac{1}{4 \log(n) \max\{1, \alpha + \beta\}}. \quad (19)$$

Now we come to the proofs of lemmas and the corollary in the main text.

### 6.1. Proof of Lemma 2

**(a) + (b):** From the definitions of  $a_i^k$  and  $a_i^*$ , we have

$$\log\left(\frac{a_i^*}{a_i^k}\right) = \left(\frac{u_i^* - u_i^k}{\eta}\right) + \log\left(\frac{\sum_{j=1}^n \exp(\frac{v_j^* - C_{ij}}{\eta})}{\sum_{j=1}^n \exp(\frac{v_j^k - C_{ij}}{\eta})}\right).$$

The required inequalities are equivalent to an upper bound and a lower bound for the second term of the RHS. Apply part (a) of Lemma 6, we obtain

$$\min_{1 \leq j \leq n} \frac{v_j^* - v_j^k}{\eta} \leq \log\left(\frac{a_i^*}{a_i^k}\right) - \frac{u_i^* - u_i^k}{\eta} \leq \max_{1 \leq j \leq n} \frac{v_j^* - v_j^k}{\eta}.$$

Part (b) follows similarly. Therefore, we obtain the conclusion of Lemma 2.

### 6.2. Proof of Corollary 2

Recall that we have proved in Lemma 4:

$$\begin{aligned} g(X^*) + (2\tau + \eta)x^* &= \tau(\alpha + \beta), \\ f(\widehat{X}) + 2\tau\widehat{x} &= \tau(\alpha + \beta). \end{aligned}$$

From the second equality and the fact that  $f(\widehat{X}) \geq 0$  (it is easy to see that for  $X$  that  $X_{ij} \geq 0$ , the **KL** terms and  $\langle C, X \rangle$  are all non-negative), we immediately have  $\widehat{x} \leq \frac{\alpha + \beta}{2}$ , proving the second inequality. For the first inequality, we have  $g(X^*) \geq -\eta H(X^*) \geq -2\eta x^* \log(n) - \eta x^* + \eta x^* \log(x^*)$ . Therefore, we find that

$$\begin{aligned} -2\eta x^* \log(n) - \eta x^* + \eta x^* \log(x^*) &\leq \tau(\alpha + \beta) - (2\tau + \eta)x^*, \\ \eta x^* \log(x^*) + 2(\tau - \eta \log(n))x^* &\leq \tau(\alpha + \beta). \end{aligned}$$

It follows from the inequality  $z \log(z) \geq z - 1$  for all  $z > 0$  that

$$\begin{aligned} \eta(x^* - 1) + 2(\tau - \eta \log(n))x^* &\leq \tau(\alpha + \beta), \\ x^*(2\tau - 2\eta \log(n) + \eta) &\leq \tau(\alpha + \beta) + \eta. \end{aligned}$$

By inequality (19),  $4\eta \log(n) \leq \tau$ . Then

$$\begin{aligned} x^* &\leq \frac{\tau(\alpha + \beta) + \eta}{2\tau - 2\eta \log(n) + \eta} \leq \frac{\tau(\alpha + \beta) - (\alpha + \beta)\eta \log(n)}{2\tau - 2\eta \log(n)} + \frac{(\alpha + \beta)\eta \log(n) + \eta}{2\tau - 2\eta \log(n)}, \\ &\leq \frac{\alpha + \beta}{2} + (\alpha + \beta) \frac{\eta \log(n)}{2\tau - 2\eta \log(n)} + \frac{\frac{\tau}{4 \log(n)}}{\frac{3}{2}\tau} \leq \left(\frac{1}{2} + \frac{\eta \log(n)}{2\tau - 2\eta \log(n)}\right)(\alpha + \beta) + \frac{1}{6 \log(n)}. \end{aligned}$$

As a consequence, we obtain the conclusion of the corollary.

### 6.3. Proof of Lemma 5

**(a)** We prove that  $\Lambda_k \leq \frac{\eta^2}{8(\tau+1)}$  for  $\eta = \frac{\varepsilon}{U}$  and  $k \geq \left(\frac{\tau}{\eta} + 1\right) \left[\log(8\eta R) + \log(\tau(\tau+1)) + 3\log\left(\frac{1}{\eta}\right)\right]$  (note that the stated bound can be obtained by replacing  $k$  with  $k-1$ ).

Denote  $\frac{8\eta R(\tau+1)}{\tau^2} = D$  and  $\frac{\eta}{\tau} = s > 0$ . From inequality (19), we have  $s < 1$ . The required inequality is equivalent to

$$\frac{\eta^2}{8(\tau+1)} \geq \left(\frac{\tau}{\tau+\eta}\right)^k \tau R \iff \left(\frac{\tau+\eta}{\tau}\right)^k \frac{\eta^3}{\tau^3} \geq \frac{8\eta R(\tau+1)}{\tau^2} \iff (1+s)^k s^3 \geq D.$$

Let  $t = 1 + \frac{\log(D)}{3 \log(\frac{1}{s})}$ . By definition (5),  $R \geq \log(n)$ , thus  $D \geq \frac{8\eta \log(n)(\tau+1)}{\tau^2} > \frac{\eta^3}{\tau^3} = s^3$  and  $t > 1 + \frac{3 \log(s)}{3 \log(\frac{1}{s})} = 0$ . We claim the following chain of inequalities

$$\begin{aligned} s^3(1+s)^k &\geq s^3(1+s)^{(\frac{1}{s}+1)3 \log(\frac{1}{s})t} \\ &\geq s^3 e^{3 \log(\frac{1}{s})t}. \end{aligned}$$

The first inequality results from  $k \geq (\frac{\tau U}{\epsilon} + 1) [\log(8\eta R) + \log(\tau(\tau+1)) + 3 \log(\frac{U}{\epsilon})] = (1 + \frac{1}{s})3 \log(\frac{1}{s})t > 0$  (using the definitions of  $D$ ,  $s$ , the choice of  $t$  and  $\eta = \frac{\epsilon}{U}$ ). The second inequality is due to part (d) of Lemma 6. The last equality is

$$s^3 e^{3 \log(\frac{1}{s})t} = \frac{1}{s^{3t-3}} = \frac{1}{s^{\log(D)/\log(1/s)}} = \frac{1}{s^{-\log_s(D)}} = D.$$

We have thus proved our claim of part (a).

(b) We need to prove  $|x^k - x^*| \leq \frac{3}{\eta} \min\{x^*, x^k\} \Delta_k$ . From the definition of  $x^k$  and  $x^*$  and note that they are non-negative:

$$x^k = \sum_{i,j=1}^n \exp\left(\frac{u_i^k + v_j^k - C_{ij}}{\eta}\right) \quad \text{and} \quad x^* = \sum_{i,j=1}^n \exp\left(\frac{u_i^* + v_j^* - C_{ij}}{\eta}\right).$$

Now, we have

$$\frac{\exp\left(\frac{u_i^k + v_j^k - C_{ij}}{\eta}\right)}{\exp\left(\frac{u_i^* + v_j^* - C_{ij}}{\eta}\right)} = \exp\left(\frac{u_i^k - u_i^*}{\eta}\right) \exp\left(\frac{v_j^k - v_j^*}{\eta}\right) \leq \left[\max_{1 \leq i \leq n} \exp\left(\frac{|u_i^k - u_i^*|}{\eta}\right)\right] \left[\max_{1 \leq j \leq n} \exp\left(\frac{|v_j^k - v_j^*|}{\eta}\right)\right].$$

Note that each of  $x^k$  and  $x^*$  is the sum of  $n^2$  elements and the ratio between  $\exp\left(\frac{u_i^k + v_j^k - C_{ij}}{\eta}\right)$  and  $\exp\left(\frac{u_i^* + v_j^* - C_{ij}}{\eta}\right)$  is bounded by  $\left[\max_{1 \leq i \leq n} \exp\left(\frac{|u_i^k - u_i^*|}{\eta}\right)\right] \left[\max_{1 \leq j \leq n} \exp\left(\frac{|v_j^k - v_j^*|}{\eta}\right)\right]$  for all pairs  $i, j$ . Apply part (a) of Lemma 6, we find that

$$\max\left\{\frac{x^*}{x^k}, \frac{x^k}{x^*}\right\} \leq \left[\max_{1 \leq i \leq n} \exp\left(\frac{|u_i^k - u_i^*|}{\eta}\right)\right] \left[\max_{1 \leq j \leq n} \exp\left(\frac{|v_j^k - v_j^*|}{\eta}\right)\right].$$

We have proved from part (a) that  $\Lambda_{k-1} \leq \frac{\eta^2}{8(\tau+1)} \leq \frac{\eta^2}{8}$ . From Theorem 1 we get  $\Delta_k \leq \Lambda_{k-1}$ . It means that

$$\max_{i,j} \left\{ \left| \frac{u_i^k - u_i^*}{\eta} \right|, \left| \frac{v_j^k - v_j^*}{\eta} \right| \right\} = \frac{\Delta_k}{\eta} \leq \frac{\Lambda_{k-1}}{\eta} \leq \frac{\eta}{8} \leq \frac{1}{8}.$$

Apply part (b) of Lemma 6,

$$\exp\left(\frac{|u_i^k - u_i^*|}{\eta}\right) \leq 1 + \frac{|u_i^k - u_i^*|}{\eta} + \left(\frac{|u_i^k - u_i^*|}{\eta}\right)^2, \quad \text{and} \quad \exp\left(\frac{|v_j^k - v_j^*|}{\eta}\right) \leq 1 + \frac{|v_j^k - v_j^*|}{\eta} + \left(\frac{|v_j^k - v_j^*|}{\eta}\right)^2.$$

Then, we find that

$$\begin{aligned} \max\left\{\frac{x^*}{x^k}, \frac{x^k}{x^*}\right\} &\leq \left(1 + \frac{1}{\eta} \Delta_k + \frac{1}{\eta^2} \Delta_k^2\right) \left(1 + \frac{1}{\eta} \Delta_k + \frac{1}{\eta^2} \Delta_k^2\right) = 1 + 2\frac{\Delta_k}{\eta} + 3\frac{\Delta_k^2}{\eta^2} + 2\frac{\Delta_k^3}{\eta^3} + \frac{\Delta_k^4}{\eta^4} \\ &\leq 1 + \frac{\Delta_k}{\eta} \left(2 + 3\frac{\Delta_k}{\eta} + 2\frac{\Delta_k^2}{\eta^2} + \frac{\Delta_k^3}{\eta^3}\right) \leq 1 + \frac{\Delta_k}{\eta} \left(2 + 3\frac{1}{8} + 2\frac{1}{8^2} + \frac{1}{8^3}\right) \\ &\leq 1 + 3\frac{\Delta_k}{\eta}. \end{aligned}$$

Apply part (c) of Lemma 6, we get

$$|x^k - x^*| \leq \frac{3}{\eta} \Delta_k \min\{x^k, x^*\}.$$

Therefore, we obtain the conclusion of part (b).

(c) From Lemma 5(a) and Theorem 1 we have  $\frac{\Delta_k}{\eta} \leq \frac{\Lambda_k}{\eta} \leq \frac{\eta}{8} \leq \frac{1}{12}$ . By part (b) of Lemma 5, we have  $x^k \leq x^* + \frac{3}{\eta} \Delta_k x^* \leq \frac{3}{2} x^*$ . Then, we obtain that

$$\begin{aligned} x^k &\leq x^* + \frac{3}{\eta} \Delta_k x^* \leq \left[ (\alpha + \beta) \left( \frac{1}{2} + \frac{\eta \log(n)}{2\tau - 2\eta \log(n)} \right) + \frac{1}{6 \log(n)} \right] \left( 1 + 3 \frac{\Delta_k}{\eta} \right) \\ &\leq (\alpha + \beta) \left( \frac{1}{2} + \frac{\eta \log(n)}{2\tau - 2\eta \log(n)} \right) \left( 1 + 3 \frac{\Delta_k}{\eta} \right) + \frac{1}{4 \log(n)} \\ &\leq \frac{1}{2} (\alpha + \beta) + (\alpha + \beta) \frac{3}{2} \frac{\Delta_k}{\eta} + (\alpha + \beta) \frac{\eta \log(n)}{\tau} + \frac{1}{4 \log(n)} \\ &\leq \frac{1}{2} (\alpha + \beta) + \frac{1}{4} + (\alpha + \beta) \frac{3\eta}{12\tau} + \frac{1}{4 \log(n)} \\ &\leq \frac{1}{2} (\alpha + \beta) + \frac{1}{2} + \frac{1}{4 \log(n)}. \end{aligned}$$

As a consequence, we reach the conclusion of part (c).
